# Supplementary material for: Above room-temperature dielectric and nonlinear optical switching materials based on [(CH3)3S]2[MBr4] (M = Cd, Mn and Zn)
Source: Royal Society of Chemistry journal article supplement (doi:10.1039/c9dt02045d), 2019-01-01
Supplement: c9dt02045d1.pdf [file c9dt02045d1.pdf]

## Above-room-temperature dielectric and nonlinear optical switching materials based on the $[(\text{CH}_3)_3\text{S}]_2[\text{MBr}_4]$ ( $\text{M} = \text{Cd}$ , $\text{Mn}$ and $\text{Zn}$ )

Xiao-Gang Chen,<sup>a</sup> Yao-Zu Zhang,<sup>a</sup> Dong-Sheng Sun,<sup>a</sup> Ji-Xing Gao,<sup>a</sup> Xiu-Ni Hua,<sup>a</sup> Wei-Qiang Liao<sup>\*ab</sup>

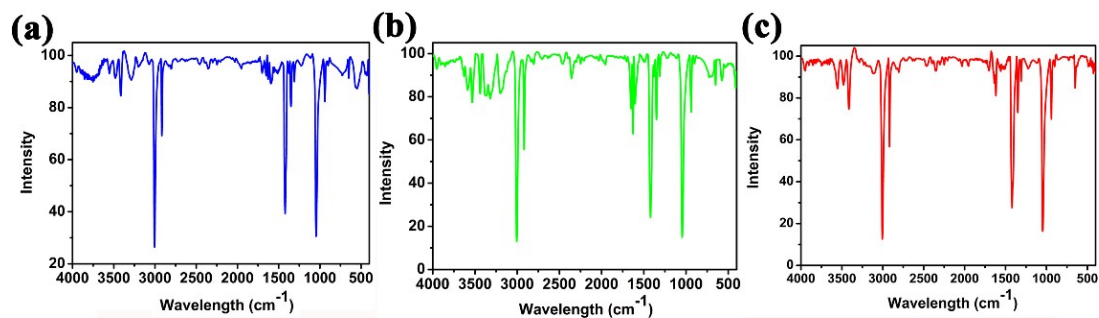

**Figure S1.** Infrared (IR) spectra of solids **1** (a), **2** (b) and **3** (c) in KBr pellet recorded on a Shimadzu model IR-60 spectrometer at room temperature.

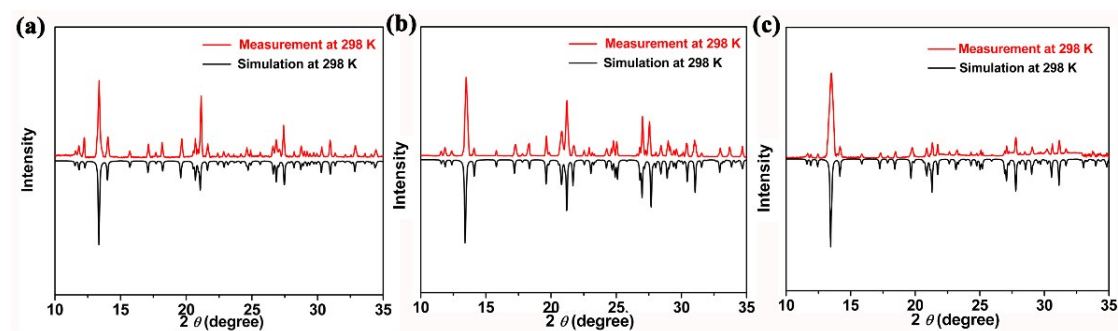

**Figure S2.** PXRD patterns of **1** (a) and **2** (b) and **3** (c) at room temperature.

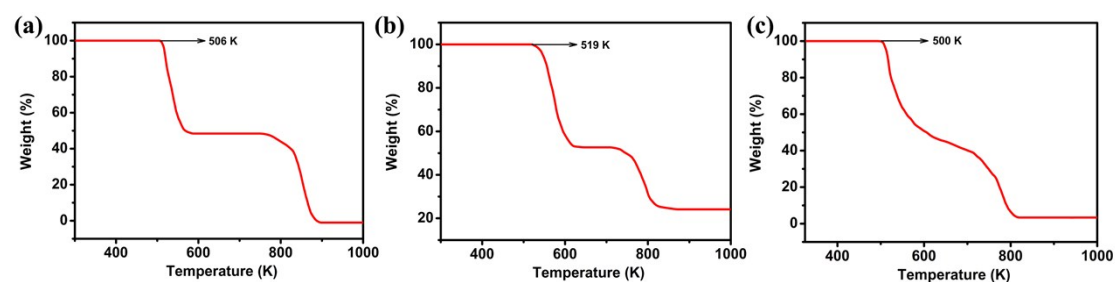

**Figure S3.** The TG curves of **1** (a), **2** (b) and **3** (c).

**Table S1.** Thermal analysis of **1**, **2** and **3** in the third circle.

| Compound | $T_c/\text{K}$ |       | $\Delta H/\text{KJ mol}^{-1}$ | $\Delta S/\text{J K}^{-1}\text{mol}^{-1}$ | N   |
|----------|----------------|-------|-------------------------------|-------------------------------------------|-----|
| <b>1</b> | heating        | 315 K | 20.7                          | 38.5                                      | 103 |
|          | cooling        | 283 K | 19.8                          | 41.0                                      | 139 |
| <b>2</b> | heating        | 315 K | 23.9                          | 40.1                                      | 124 |
|          | cooling        | 283 K | 22.9                          | 42.8                                      | 172 |
| <b>3</b> | heating        | 315 K | 20.4                          | 35.0                                      | 67  |
|          | cooling        | 278 K | 19.4                          | 37.6                                      | 92  |

**Table S2.** Crystal data of **1**, **2** and **3**.

| Compound                    | <b>1</b>                                 | <b>2</b>                                 | <b>3</b>                                 |
|-----------------------------|------------------------------------------|------------------------------------------|------------------------------------------|
| Temperature                 | 273 K                                    | 343 K                                    | 273 K                                    |
| Formula                     | $[\text{Me}_3\text{S}]_2[\text{CdBr}_4]$ | $[\text{Me}_3\text{S}]_2[\text{CdBr}_4]$ | $[\text{Me}_3\text{S}]_2[\text{MnBr}_4]$ |
| Formula weight              | 586.33                                   | 586.33                                   | 528.86                                   |
| Crystal system              | Orthorhombic                             | Orthorhombic                             | Orthorhombic                             |
| Space group                 | $P2_12_12_1$                             | $Pnma$                                   | $Pnma$                                   |
| $a, b, c$ (Å)               | 9.0610(5)<br>13.2205(9)<br>14.3990(7)    | 12.547(3)<br>8.969(2)<br>16.063(4)       | 9.0416(3)<br>13.1334(6)<br>14.2839(6)    |
| $\alpha, \beta, \gamma$ (°) | 90<br>90<br>90                           | 90<br>90<br>90                           | 90<br>90<br>90                           |
| Volume /Å <sup>3</sup>      | 1724.87(17)                              | 1807.6(7)                                | 1696.17(12)                              |
| Z                           | 4                                        | 2                                        | 4                                        |

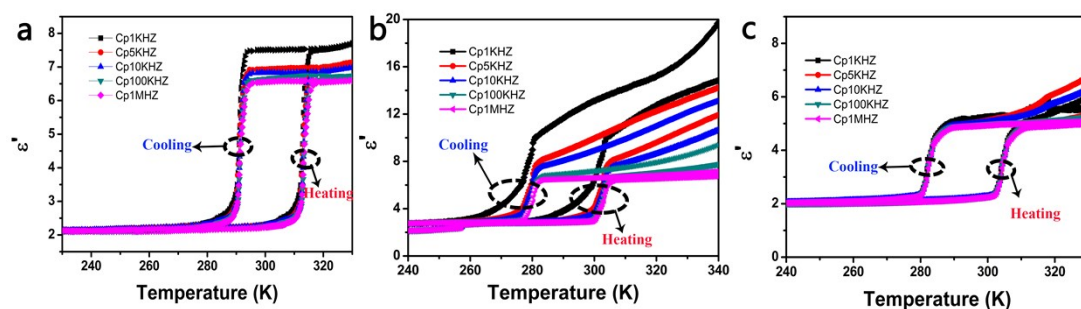**Figure S4.** Temperature-dependent dielectric constants of **1** (a), **2** (b) and **3** (c) measured at selected frequencies (1 kHz -1 MHz)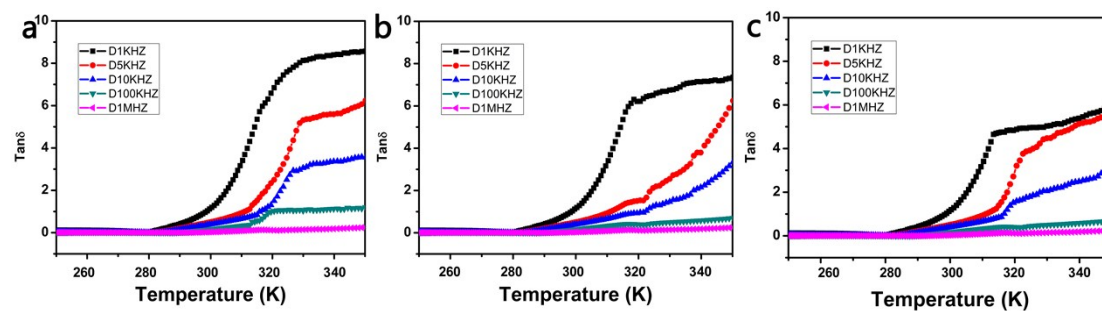**Figure S5.** The temperature-dependence of dielectric loss ( $\tan\delta$ ) of **1**, **2** and **3** measured at selected frequencies (1000 Hz-1 MHz) in the heating process.
